2 **A mutational hotspot that determines highly repeatable evolution can be built and broken by**  
3 **silent genetic changes**

4 **Authors:** James S. Horton<sup>1,\*</sup>, Louise M. Flanagan<sup>1</sup>, Robert W. Jackson<sup>2</sup>, Nicholas K. Priest<sup>1,a</sup>, and  
5 Tiffany B. Taylor<sup>1,\*a</sup>

6 <sup>1</sup>Milner Centre for Evolution, Department of Biology & Biochemistry, University of Bath, Claverton  
7 Down, Bath BA2 7AY, UK

8 <sup>2</sup>School of Biosciences and Birmingham Institute of Forest Research (BIFoR), University of  
9 Birmingham, Edgbaston, Birmingham, B15 2TT, UK

10 <sup>a</sup>These authors share senior authorship

11 **\*Corresponding Authors:** James S. Horton, Milner Centre for Evolution, Department of Biology &  
12 Biochemistry, University of Bath, Claverton Down, Bath BA2 7AY, UK, +44 (0)1225 385116,  
13 [j.s.horton@bath.ac.uk](mailto:j.s.horton@bath.ac.uk).

14 Tiffany B. Taylor, Milner Centre for Evolution, Department of Biology & Biochemistry, University of  
15 Bath, Claverton Down, Bath BA2 7AY, UK, +44 (0)1225 384398, [t.b.taylor@bath.ac.uk](mailto:t.b.taylor@bath.ac.uk)

16 **Keywords:** Repeatable evolution, Mutational hotspot, Silent mutation, Mutation rate heterogeneity,  
17 Experimental evolution

18

19 **Abstract**

20 Mutational hotspots can determine evolutionary outcomes and make evolution repeatable. Hotspots are  
21 products of multiple evolutionary forces including mutation rate heterogeneity, but this variable is often  
22 hard to identify. In this work we reveal that a powerfully deterministic genetic hotspot can be built and  
23 broken by a handful of silent mutations. We observed this when studying homologous immotile variants  
24 of the bacteria *Pseudomonas fluorescens*, AR2 and Pf0-2x. AR2 resurrects motility through highly  
25 repeatable *de novo* mutation of the same nucleotide in >95% lines in minimal media (*ntrB* A289C).  
26 Pf0-2x, however, evolves via a number of mutations meaning the two strains diverge significantly  
27 during adaptation. We determined that this evolutionary disparity was owed to just 6 synonymous  
28 variations within the *ntrB* locus, which we demonstrated by swapping the sites and observing that we  
29 were able to both break (>95% to 0% in AR2) and build (0% to 80% in Pf0-2x) a powerfully  
30 deterministic mutational hotspot. Our work reveals a fundamental role for silent genetic variation in  
31 determining adaptive outcomes.

## 32 **Introduction**

33 Mutational hotspots, which describe instances where independent cell lines persistently fix mutations  
34 at the same genomic sites, can make evolution remarkably repeatable. Such hotspots are of immense  
35 importance as they have been observed to drive evolution across the domains of life, from viruses  
36 (including SARS-CoV-2; Weber et al. 2020), to bacteria (including MRSA; Sekowska et al. 2016), to  
37 higher eukaryotic cell lines including those in avian species (Galen et al. 2015) and human cancers  
38 (Trevino 2020). Our understanding of evolutionary dynamics (e.g. competitive selection and clonal  
39 interference) can sometimes explain the appearance of hotspots, but genetic features that build hotspots  
40 by biasing mutation rates are much less understood.

41 There have been many examples of experimental systems evolving via repeatable evolution. Microbes  
42 evolving under strong selection often rapidly adopt similar novel phenotypes (Fong et al. 2005;  
43 Ostrowski et al. 2008). Furthermore, these phenotypes are often underpinned by mutation hotspots,  
44 which come in the form of clustered genetic changes within the same region of the genome (Riehle et  
45 al. 2001; Fraebel et al. 2017), or within limited pockets of loci (Bull et al. 1997; Wichman et al. 1999;  
46 Herron and Doebeli 2013; Kram et al. 2017). Sometimes realised mutations are found only in genes  
47 from a single regulatory pathway (Notley-McRobb and Ferenci 1999; Miller et al. 2013) or a single  
48 protein complex (Avrani et al. 2017). In extreme cases, evolutionary events can be seen to repeatedly  
49 target just a handful of sites within a single locus (Meyer *et al.*, 2012; van Ditmarsch *et al.*,  
50 2013). Repeatable evolution allows lines to evolve in parallel, and the degree of parallelism typically  
51 becomes less common as it descends from broader genomic regions to the nucleotide (Tenailon et al.  
52 2012; Bailey et al. 2015). However, despite frequent descriptions of repeatable evolutionary events, a  
53 detailed understanding of the hotspots that ensure their occurrence is often lacking.

54 There are three primary facilitators of mutational hotspots that drive repeatable evolution: (i) Fixation  
55 bias, which skews evolution toward mutations that enjoy a higher likelihood of dominating the  
56 population pool. Not all facilitators of fixation bias are considered adaptively advantageous (Eyre-  
57 Walker and Hurst 2001), but in instances where we observe rapid and highly parallel sweeps it will  
58 likely take the form of selection, which drives the fittest competing genotypes in the population to  
59 fixation (see Wood, Burke and Rieseberg, 2005; Woods *et al.*, 2006). (ii) Mutational accessibility, as  
60 there may be only a small number of readily accessible mutations a genotype can undergo to improve  
61 fitness (Weinreich et al. 2006). And, (iii) Mutation rate heterogeneity, where genetic and molecular  
62 features scattered throughout the genome cause sites to radiate at different rates, introducing a mutation  
63 bias toward a particular outcome (Bailey et al. 2017). Previous research shows that mutation rate  
64 heterogeneity can be influenced by the arrangement of nucleotides surrounding a particular site (Long  
65 et al. 2014), and genetic features such as the secondary structure of DNA (Duan et al. 2018) including

66 the formation of single-stranded DNA hairpins (De Boer and Ripley 1984). Nevertheless, the  
67 prominence of genetic sequence in driving parallel evolutionary outcomes remains unknown.

68 To establish which mechanisms are at play, it is important to consider whether parallel outcomes are  
69 robust to experimental conditions such as environment (Turner et al. 2018) and to account for clonal  
70 interference, which can alter the chance of observing parallel evolution (Bailey et al. 2017; Lässig et al.  
71 2017). Clonal interference can occur either due to standing genetic variation in the founder population  
72 which yields multiple adaptive genotypes in a novel environment (i.e. a soft selective sweep; Hermisson  
73 and Pennings, 2005) or when mutation rate is high relative to the selective coefficient (Barrett et al.  
74 2006). However, clonal interference does not often play an important role when founding experimental  
75 lines with clonal samples, performing experimental procedures over short timescales, and ensuring  
76 rapid fixation of adaptive mutants e.g. through spatial separation and/or introducing an artificial  
77 bottleneck.

78 In this work, we have utilised an ideal system for identifying the key features that build mutational  
79 hotspots. We have employed two engineered non-flagellate and biosurfactant-deficient strains of the  
80 soil bacteria *P. fluorescens*: AR2, derived from SBW25, and Pf0-2x, derived from Pf0-1 (see materials  
81 and methods). The strains share homologous genetic backgrounds, including highly similar gene  
82 regulatory architectures and translated protein products, yet they evolve divergently due to local genetic  
83 differences. Both engineered strains lack function of the master regulator of flagella-dependent motility,  
84 FleQ, and both AR2 and Pf0-2x rapidly re-evolved flagella-mediated motility under strong directional  
85 selection (Taylor et al. 2015). In AR2, this phenotype was achieved in independent lineages via  
86 repeatable *de novo* mutation in the *ntrB* locus of the nitrogen regulatory (*ntr*) pathway. The parallel  
87 evolution of *ntrB* mutants was noteworthy as the locus was consistently targeted, whereas Pf0-2x lines  
88 evolved motility via mutations across the *ntr* regulatory hierarchy (Taylor et al. 2015). As such parallel  
89 evolution between these homologs varied across scale; both were parallel to the phenotype and targeted  
90 gene regulatory network, but only one possessed a mutational hotspot that concentrated mutations at a  
91 single nucleotide site within a single locus. We conducted a series of experiments to find out why.

92 Here we show that motility evolves in AR2 in an extremely repeatable manner, which is absent in Pf0-  
93 2x due to a genetic feature predicated on synonymous variation. The evolution of flagella motility in  
94 AR2 was found to target the same nucleotide substitution in over 95% of cases in minimal medium  
95 (M9). This outcome was found to be robust across multiple nutrient regimes both in the immotile  
96 SBW25 variant (AR2) and another SBW25 variant that was able to access biosurfactant-mediated  
97 motility prior to evolution (SBW25  $\Delta$ *fleQ*). The role of selection and the number of viable mutational  
98 routes in ensuring the parallel outcome were found to provide some explanation for parallel evolution  
99 to the level of the *ntrB* locus, but not the nucleotide. This therefore implied that intra-locus mutation  
100 rate heterogeneity was playing a critical role. We then genetically augmented the *ntrB* locus to indirectly

101 incriminate mutation bias and revealed a key underlying genetic driver of parallel evolution. Six silent  
102 nucleotide changes were introduced within the local region around the frequently targeted site to make  
103 AR2's genetic sequence match Pf0-2x, but without altering the protein product. These changes were  
104 found to reduce parallel evolution at the mutational hotspot from >95% to 0%. In a reciprocal  
105 experiment, silent changes introduced to the homologous strain Pf0-2x to match AR2's local native  
106 sequence raised parallel evolution at this site from 0% to 80%. These results reveal that synonymous  
107 genetic sequence can play a dominant role in ensuring parallel evolutionary outcomes, and shines a  
108 spotlight on the overlooked mechanistic drivers behind mutational hotspots.

109

## 110 **Results**

### 111 **SBW25-derived immotile strains evolve motility via highly repeatable evolution**

112 To quantify the degree of parallel evolution of flagellar motility within the immotile SBW25 model  
113 system, we placed 24 independent replicates of AR2 under strong directional selection in a minimal  
114 medium environment (M9). Motile mutants were readily identified through emergent motile zones that  
115 migrated outward in a concentric circle (fig. 1A). Clonal samples were isolated from the zone's leading  
116 edge within 24 h of emergence and their genotypes analysed through either whole-genome or targeted  
117 Sanger sequencing of the *ntrB* locus. Motile strains evolved rapidly (fig. 1B) and each independent line  
118 was found to be a product of a one-step *de novo* mutation. All 24 lines had evolved in parallel at the  
119 locus level: each had acquired a single, motility-restoring mutation within *ntrB* (fig. 1C). More  
120 surprising however, was the level of parallel evolution within the locus. 23/24 replicates had acquired  
121 a single nucleotide polymorphism at site 289, resulting in a transversion mutation from A to C (hereafter  
122 referred to as *ntrB* A289C). This resulted in a T97P missense mutation within NtrB's PAS domain. The  
123 remaining sample had acquired a 12-base-pair deletion from nucleotide sites 406-417 ( $\Delta$ 406-417),  
124 resulting in an in-frame deletion of residues 136-139 ( $\Delta$ LVRG) within NtrB's phospho-acceptor  
125 domain.

### 126 **Repeatable evolution is robust to nutritional environment**

127 Repeatable evolution could be robust or highly context-dependent, especially when it occurs via *de*  
128 *nov* mutations with antagonistic pleiotropic effects (McGrath et al. 2011; Mcgee et al. 2016; Sackman  
129 et al. 2017). However, we found that the repeatability of the *ntrB* A289C mutation was robust across  
130 all tested conditions, despite evidence of antagonistic pleiotropic effects on growth. We tested for  
131 environment-specific antagonistic pleiotropy by measuring relative growth of the ancestral line and  
132 both evolved *ntrB* mutants on rich lysogeny broth and minimal medium containing either ammonia as  
133 the sole nitrogen source or supplemented with either glutamate (M9+glu) or glutamine (M9+gln), both  
134 of which are naturally assimilated and metabolised by the ntr system. Though large fitness costs were  
135 evident in M9 minimal medium, supplementing M9 with glu or gln reduced levels of antagonistic  
136 pleiotropy for both the *ntrB* A289C and the  $\Delta$ 406-417 mutants (supplementary fig. S1). Indeed, the  
137 antagonistic pleiotropy of impaired metabolism was sufficiently low in M9 supplemented with the  
138 amino acid glutamine (M9+gln) that motile mutants had increased fitness over the ancestral line in static  
139 broth, which was significant in *ntrB* A289C ( $P = 0.0361$ , supplementary fig. S1). These findings show  
140 that antagonistic pleiotropy is harsh in M9 and alleviated substantially in other nutritional environments,  
141 and therefore evolution in minimal media may have been limiting the viable number of adaptive routes.

142 We then tested whether repeatable evolution was robust to varying levels of antagonistic pleiotropy in  
143 our model system. Our expectation was that supplemented nutrient regimes would lower pleiotropic

144 costs and thus unlock alternative routes of adaptation. We additionally hypothesised that a strain which  
145 is able to migrate prior to mutation would also ease starvation-induced selection pressures and could  
146 facilitate yet more mutational routes. For this experiment we therefore utilised an additional immotile  
147 variant of SBW25, which unlike AR2 did not have a transposon inserted into *viscB* (see materials and  
148 methods) and thus could migrate via a form of sliding motility prior to mutation (SBW25- $\Delta fleQ$   
149 (hereafter  $\Delta fleQ$ ), Alsohim et al. 2014). We observed a ‘blebbing’ phenotype (fig. 1A) in  $\Delta fleQ$  lines  
150 despite their ability to migrate in a dendritic fashion; however, we also found blebbing was less frequent  
151 under richer nutrient regimes (where populations migrated more rapidly utilising viscosin, see materials  
152 and methods). Overall, there was no evidence that the prevalence of the mutational hotspot *ntrB* A289C  
153 changed with nutrient condition (Gene-by-environment interaction:  $\chi^2 = 0.9375$ ,  $df = 7$ ,  $P = 0.9958$ , see  
154 fig. 2). Instead, we observed that the *ntrB* A289C mutation was robust across all tested conditions,  
155 featuring in 90-100% of the  $\Delta fleQ$  strains and 80-100% of AR2 strains (fig. 2).

### 156 **Repeatable evolution occurs despite motility being accessible via several mutational routes**

157 Our evolution experiments across nutrient regimes uncovered three novel mutational routes that were  
158 observed in a small number of mutants (fig. 2), revealing that mutational accessibility could not explain  
159 the level of observed parallel evolution. Most notably was a non-synonymous A-C transversion  
160 mutation at site 683 (*ntrB* A683C) in a  $\Delta fleQ$  line evolved on M9+gln, resulting in a missense mutation  
161 within the NtrB histidine kinase domain. As a single A-C transversion within the same locus, we may  
162 expect A683C to mutate at a similar rate to A289C. We also observed a 12 base-pair deletion from sites  
163 410-421 (*ntrB*  $\Delta 410-421$ ) in an AR2 line evolved on M9+gln. Furthermore, we discovered a double  
164 mutant in an AR2 line evolved on M9+glu: one mutation was a single nucleotide deletion at site 84  
165 within *glnK*, and the second was another A to C transversion at site 688 resulting in a T230P missense  
166 mutation within RNA polymerase sigma factor 54.

167 GlnK is NtrB’s native regulatory binding partner and repressor in the *ntr* pathway, meaning the  
168 frameshift mutation alone likely explains the observed motility phenotype. However, as this mutant  
169 underwent two independent mutations we will not consider it for the following analysis. In addition,  
170 *ntrB*  $\Delta 410-421$  and *ntrB*  $\Delta 406-417$ , despite targeting different nucleotides, translate into identical  
171 protein products (both compress residues LVRGL at positions 136-140 to a single L at position 136).  
172 Therefore, we will also group them for the following analysis. Under the assumptions that the three  
173 remaining one-step observed mutational routes to novel proteins are (i) equally likely to appear in the  
174 population and (ii) equally likely to reach fixation, the original observation of *ntrB* A289C appearing  
175 in 23/24 cases becomes exceptional (Bootstrap test:  $n = 1000000$ ,  $P < 1 \times 10^{-6}$ ). The likelihood of our  
176 observing this by chance, therefore, is highly unlikely. This means that one or both assumptions are  
177 almost certainly incorrect. Either the motility phenotype facilitated by the mutations may be unequal,  
178 leading to fixation bias. Or the mutations may appear in the population at different rates, resulting in

179 mutation bias. One or both of these elements must be skewing evolution to such a degree that parallel  
180 evolution to nucleotide resolution becomes highly predictable.

### 181 **Fixation bias cannot explain repeatability to nucleotide resolution**

182 The Darwinian explanation for parallel evolution is that the observed mutational path is outcompeting  
183 all others on their way to fixation. If selection alone was driving repeatable evolutionary outcomes, the  
184 superior fitness of the *ntrB* A289C genotype should have allowed it to out-migrate other motile  
185 genotypes co-existing in the population. To test if the *ntrB* A289C mutation granted the fittest motility  
186 phenotype, we allowed the evolved genotypes (A289C,  $\Delta$ 406-417, A683C and *glnK*  $\Delta$ 84) to migrate  
187 independently on the four nutritional backgrounds and measured their migration area after 48 h. To  
188 allow direct comparison, we first engineered the *ntrB* A683C mutation, which originally evolved in the  
189  $\Delta$ *fleQ* background, into an AR2 strain. We observed that the non-*ntrB* double mutant, *glnK*  $\Delta$ 84,  
190 migrated significantly more slowly than *ntrB* A289C in all four nutrient backgrounds (M9:  $P = 0.00153$ ,  
191 M9+gln:  $P = 0.0229$ , M9+glu:  $P = 0.00460$ , LB:  $P = 0.00476$ , fig. 3A). However, *ntrB* A289C did not  
192 significantly outperform either of the alternative *ntrB* mutant lines in any environmental condition ( $P$   
193 value range = 0.0567 – 0.878 fig. 3A). This suggests that selection may have played a role in driving  
194 parallel evolution to the level of the *ntrB* locus, but it cannot explain why nucleotide site 289 was so  
195 frequently radiated.

196 To determine if this result remained true when mutant lines were competing in the same population, we  
197 directly competed *ntrB* A289C against *ntrB* A683C on M9 minimal medium. In brief, we co-inoculated  
198 the two mutant lines on the same soft agar surface and allowed them to competitively migrate before  
199 sampling from the leading edge after 24 h of competition. The length of competition was maintained  
200 throughout the assay, but *ntrB* A683C lines were allowed to migrate for between 0 and 12 h before the  
201 addition of *ntrB* A289C to the agar. We observed that *ntrB* A289C was found predominantly on the  
202 leading edge (3/4 replicates) when the mutants were inoculated concurrently, but invading populations  
203 of the common genotype swiftly became unable to establish themselves at the leading edge within a  
204 narrow time window of 3 h (fig. 3B). This result highlights that in minimal medium *ntrB* A289C does  
205 offer a slight dominant phenotype, but to ensure establishment at the leading edge the genotype would  
206 need to appear in the population within a handful of generations of a competitor. Given that the range  
207 in time before a motility phenotype was observed could vary considerably between independent lines  
208 (fig. 1B), our data do not support the hypothesis that global mutation rate could be high enough to allow  
209 multiple phenotype-granting mutations to appear in the population almost simultaneously. More likely  
210 is that each independent line adhered to the “early bird gets the worm” maxim, i.e. the *ntrB* mutant  
211 which was the first to appear in the population was the genotype that reached fixation. This therefore  
212 suggests that the reason *ntrB* A289C is so frequently collected when sampling is due to an evolutionary  
213 force other than selection and mutational accessibility.



## 214 **Silent genetic variation can break a mutational hotspot**

215 Local mutational biases can play a key role in evolution (Bailey et al. 2017; Lind et al. 2019). Such  
216 biases can be introduced by changing DNA curvature (Duan et al. 2018) or through neighbouring tracts  
217 of reverse-complement repeats (palindromes and quasi-palindromes), which have been shown to invoke  
218 local mutation biases by facilitating the formation of single-stranded DNA hairpins (De Boer and Ripley  
219 1984). Therefore we next searched for a local mutation bias at *ntrB* site 289. Previously, we re-evolved  
220 motility in two engineered immotile strains of *P. fluorescens*, AR2 (derived from SBW25) and Pf0-2x  
221 (derived from Pf0-1) (Taylor et al. 2015). Although evolved lines in AR2 frequently targeted *ntrB*, Pf0-  
222 2x lines fixed mutations across the *ntr* regulatory pathway. Furthermore, although Pf0-2x did acquire  
223 *ntrB* mutations in multiple independent lines, we observed no evidence of *ntrB* site 289 being targeted  
224 (Taylor et al. 2015). The NtrB proteins of SBW25 and Pf0-1 are highly homologous (95.57% identity)  
225 but share less identity at the genetic level (88.88% identity). A considerable portion of this genetic  
226 variation is explained by synonymous genetic variation (8.34%) rather than non-synonymous variance  
227 (2.76%). Synonymous mutations can play a role in altering local mutation rates. This may occur by  
228 altering the nucleotide-triplet to one with a higher mutation rate (Long et al. 2014) or by altering the  
229 secondary structure of longer DNA tracts via the mechanisms outlined above. Nucleotides that remain  
230 unpaired when their neighbouring nucleotides form hairpins with nearby reverse-complement tracts  
231 have been observed to exhibit increased mutation rates (Wright et al. 2003). Both SBW25 and Pf0-1  
232 were found to have short reverse-complement tracts that flanked site 289, however the called hairpins  
233 were not entirely identical in their composition owing to synonymous variance (supplementary fig. S2).  
234 Overall, there are 6 synonymous nucleotide substitutions  $\pm$  5 codons flanking site 289 (C276G, C279T,  
235 C285G, C291G, T294G and G300C), which may have been affecting such hairpin formations and  
236 impacting local mutation rate.

237 To test if synonymous sequence was biasing evolutionary outcomes, we replaced the 6 synonymous  
238 sites in an AR2 strain with those from a Pf0-1 background (hereafter AR2-sm). Not all these sites  
239 formed part of a theoretically predicted stem that overlapped with site 289, but all were targeted due to  
240 their close proximity with the site. AR2-sm lines were placed under selection for motility and we  
241 observed that these lines evolved motility significantly more slowly (fig. 4A), both in M9 minimal  
242 medium and LB (Wilcoxon rank sum tests with continuity correction: M9,  $W = 44.5$ ,  $P < 0.001$ ; LB,  
243  $W = 22$ ,  $P < 0.001$ ). Evolved AR2-sm lines that re-evolved motility within 8 days were sampled and  
244 their *ntrB* locus analysed by Sanger sequencing (fig. 4B). We observed some similar *ntrB* mutations to  
245 those identified previously: the *ntrB* A683C mutation was observed in one independent line evolved on  
246 LB, and *ntrB*  $\Delta$ 406-417 was also observed in both strain backgrounds. However, the most common  
247 genotype of *ntrB* A289C fell from being observed in over 95% of independent lines in M9 to 0%.  
248 Furthermore, we observed multiple previously unseen *ntrB* mutations, while a considerable number of



249 lines reported wildtype *ntrB* sequences, instead either targeting another gene of the *ntr* pathway (*glnK*)  
250 or unidentified targets that may lay outside of the network (fig. 4B).

251 To test that the A289C transversion remained a viable mutational target in the AR2-sm genetic  
252 background, we subsequently engineered the AR2-sm strain with this motility-enabling mutation. We  
253 observed that AR2-sm *ntrB* A289C was motile and comparable in phenotype to a *ntrB* A289C mutant  
254 that had evolved in the ancestral AR2 genetic background (supplementary fig. S3). We additionally  
255 found that AR2-sm *ntrB* A289C retained comparable motility to the other *ntrB* mutants evolved from  
256 AR2-sm (supplementary fig. S3). Therefore, we can determine that the AR2-sm genetic background  
257 would not prevent motility following mutation at *ntrB* site 289, nor does it render such a mutation  
258 uncompetitive. This therefore infers that the sole variable altered between the two strains (the 6  
259 synonymous changes) are precluding radiation at site 289. Taken together these results strongly suggest  
260 that the synonymous sequence immediately surrounding *ntrB* site 289 facilitates its position as a local  
261 mutational hotspot, and that local mutational bias is imperative for realising extreme parallel evolution  
262 in our model system.

### 263 **Silent variation can build a mutational hotspot**

264 As the previous result exemplified the power of synonymous variation in breaking mutational hotspots,  
265 we next hypothesised that the same amount of variation could just as readily build a mutational hotspot.  
266 To achieve this we engineered a synonymous variant of the immotile Pf0-2x strain (Pf0-2x-sm6). This  
267 strain was a reciprocal mutant of AR2-sm, in that it had synonymous variations at the same six sites  
268 within *ntrB* but substituted so that they matched AR2's native sequence (G276C, T279C, G285C,  
269 G291C, G294T and C300G). We placed both Pf0-2x and Pf0-2x-sm6 under directional selection for  
270 motility and observed that Pf0-2x evolved motility slower than Pf0-2x-sm6 (fig. 5A) and targeted a  
271 multitude of sites across multiple loci (fig. 5B). In stark contrast, Pf0-2x-sm6 evolved both more quickly  
272 (fig. 5A; Wilcoxon rank sum tests with continuity correction: M9,  $W = 239.5$ ,  $P < 0.001$ ; LB,  $W =$   
273  $461.5$ ,  $P < 0.001$ ) and massively more parallel than its native counterpart. Pf0-2x-sm6 fixed *ntrB* A289C  
274 in 80% of instances in M9 (8/10 independent lines), despite this *de novo* mutation not appearing once  
275 in a Pf0-2x evolved line (0/22 independent lines, fig. 5B). The striking differences between the two  
276 strains from a Pf0-2x genetic background (fig. 5) clearly mirror the results observed in the AR2 genetic  
277 background (fig. 4). This reveals that a small number of synonymous variations can heavily bias  
278 mutational outcomes across genetic backgrounds and between homologous strains.

279

## 280 Discussion

281 Understanding the evolutionary forces that forge mutational hotspots and repeatedly drive certain  
282 mutations to fixation remains an immense challenge. This is true even in simple systems such as the  
283 one employed in this study, where clonal bacterial populations were evolved under strong directional  
284 selection for very few phenotypes, namely motility and nitrogen metabolism. Here we took immotile  
285 variants of *P. fluorescens* SBW25 (AR2) and Pf0-1 (Pf0-2x) that had been observed to repeatedly target  
286 the same gene regulatory pathway during the re-evolution of motility (Taylor et al. 2015). We found  
287 that evolving populations of AR2 adapted via *de novo* substitution mutation in the same locus (*ntrB*)  
288 and at the same nucleotide site (A289C) in over 95% of cases in M9 minimal medium. AR2 populations  
289 were constrained in which genetic avenues they could take to access the phenotype under selection, but  
290 mutational accessibility and fitness differences alone could not explain such a high degree of parallel  
291 evolution. Pf0-2x was distinct in that it did not evolve in parallel to nucleotide nor locus resolution. We  
292 observed that by introducing synonymous changes around the mutational hotspot (*ntrB* site 289) in both  
293 AR2 and Pf0-2x so that their local genetic sequences were swapped, we could push evolving AR2  
294 populations away from the parallel path and pull Pf0-2x lines onto the parallel path. This work reveals  
295 that synonymous sequence is an integral factor toward realising highly repeatable evolution and  
296 building a mutational hotspot in our system.

297 More recent studies have revealed that synonymous changes have an underestimated effect on fitness  
298 through their perturbances before and during translation. Synonymous sequence variance can impact  
299 fitness by changing the stability of mRNA (Kudla et al. 2009; Kristofich et al. 2018; Lebeuf-Taylor et  
300 al. 2019) and altering codons to perturb or better match the codon-anticodon ratio (Frumkin et al. 2018).  
301 To our knowledge, we have shown here for the first time that synonymous sequence can also be  
302 essential for ensuring parallel evolutionary outcomes across genetic backgrounds. Our results strongly  
303 infer that this is due to its impact on local mutational biases, which mechanistically may be owed to the  
304 formation of single-stranded hairpins that form between short inverted repeats on the same DNA strand  
305 (De Boer and Ripley 1984; Fieldhouse and Golding 1991). The formation of these secondary DNA  
306 structures provides a mechanism for intra-locus mutation bias that can operate with extremely local  
307 impact and is contingent on DNA sequence variation, as introducing synonymous changes could readily  
308 perturb the complementarity of neighbouring inverse repeats (e.g. supplementary fig. S2). Furthermore,  
309 the finding of just six synonymous mutations having a significant impact on DNA structure would not  
310 represent a surprising result, as secondary structures can be altered by single mutations (Dong et al.  
311 2001).

312 We can confidently assert that the altered mutational bias is owed to an intralocus effect, owing to the  
313 six synonymous sites all residing within 14 bases at either flank of site 289. However the full elucidation  
314 of the secondary structure and genetic mechanistic features enabling this powerful mutation bias awaits

315 further study. We know that at least a portion of the 6 substituted nucleotide sites are imperative for  
316 parallel genetic outcomes, but we do not yet know if other nucleotide features in the local  
317 neighbourhood or more broadly e.g. strand orientation (Merrikh and Merrikh 2018) or distance from  
318 the origin of replication (Long et al. 2014) may be combining with local sequence to enforce mutational  
319 biases. Interestingly, our data suggest that the mutational hotspot typically mutates so quickly as to  
320 mask mutations appearing elsewhere and outside of the nitrogen regulatory pathway, which only appear  
321 when the hotspot is perturbed (figs. 4 and 5). This therefore presents the opportunity to additionally  
322 quantify the difference in mutation rate owed to secondary structure.

323 Our findings show that the presence of a mutational hotspot was a stronger deterministic evolutionary  
324 force in our system than other variables such as nutrient regime, starvation-induced selection and  
325 genetic background. We expected the selective environments to hold some influence over evolutionary  
326 outcomes (Bailey et al. 2015) mostly owing to varying levels of antagonistic pleiotropy, which has been  
327 found to be a key driver in similar motility studies (Fraebel et al. 2017). Similarly, while parallel  
328 evolution can sometimes be impressively robust across genetic backgrounds (Vogwill et al. 2014), some  
329 innovations are strongly determined by an organism's evolutionary history (Blount et al. 2012).  
330 Genomic variation also typically combines with environmental differences to drive populations down  
331 diverse paths (Spor et al. 2014). However in our experiments, the strains that share the same 6  
332 synonymous sites evolve more similarly than those that share the same broader genetic background  
333 (figs. 4B and 5B). These results show that strains can share not only high global homology but also  
334 similar genomic architecture – including translated protein structures and gene regulatory network  
335 organisation – and yet can have strikingly different mutational outcomes when under selection for the  
336 exact same traits owing to synonymous variation. This presents intriguing questions as to whether  
337 neutral changes could facilitate the dominance of a genotype during adaptation because of a previously  
338 acquired mutational hotspot, and asks whether these mutational hotspots can be selectively enforced.

339 Models looking to describe drivers of adaptive evolution often place precedence on fitness and the  
340 number of accessible adaptive routes (Orr 2005; Krug 2019) yet pay little attention to local mutational  
341 biases (however, see Sackman *et al.*, 2017). However, mutation rate heterogeneity becomes of  
342 paramount importance when systems adhere to the Strong Selection Weak Mutation model (SSWM),  
343 which describes instances when an advantageous mutation undergoes a hard sweep to fixation before  
344 another beneficial mutation appears (Gillespie 1984). In such cases relative fitness values between  
345 adaptive genotypes are relegated to secondary importance behind the likelihood of a genotype appearing  
346 in the population. Indeed, experimental systems that adhere to the SSWM maxim have been observed  
347 to evolve in parallel despite the option of multiple mutational routes to improved fitness (Vogwill et al.  
348 2014). This suggests that uneven mutational biases can be a key driver in forming mutational hotspots  
349 and realising parallel evolution, a conclusion which has been reinforced theoretically (Bailey et al.  
350 2017) although empirical data is still lacking. Understanding the mechanistic causes of mutation rate

351 heterogeneity, therefore, will be essential if we are to determine the presence of mutational hotspots  
352 that allow for accurate predictions of evolution (Bailey et al. 2018; Lind et al. 2019). The challenge  
353 remains in identifying what these mechanistic quirks may be, where they may be found, and determining  
354 how they impact evolutionary outcomes.

355 Our work sheds light on the ability of silent genetic variation to build a mutational hotspot with  
356 functionally significant evolutionary outcomes. This hotspot is built by an adaptive site under strong  
357 directional selection that enjoys a biased mutation rate, facilitating highly repeatable evolution when  
358 mutation rate and selection align. Mutation is inherently a random process, but not all sites in the  
359 genome possess equal fixation potential. Most changes will not improve a phenotype under selection,  
360 and those that do will not necessarily mutate at the same rates. Therefore, we can increase our ability to  
361 anticipate the location of a mutational hotspot dramatically, permitting we have a detailed understanding  
362 of the evolutionary variables at play. Considerable inroads have already been made toward realising  
363 this goal. When searching for adaptive targets, it has been highlighted that loss-of-function mutations  
364 are the most frequently observed mutational type under selection (Kimura, 1968; Lind, Farr and Rainey,  
365 2015) and that a gene's wider position within its regulatory network determines its propensity in  
366 delivering phenotypic change (McDonald et al. 2009). When searching for mutational biases, it has  
367 been shown that parallel evolution at the level of the locus is partially determined by gene length (Bailey  
368 et al. 2018) and that molecular apparatus involved in replication and repair can strongly influence the  
369 likelihood of a given nucleotide substitution (Lind and Andersson 2008; Stoltzfus and McCandlish  
370 2017). Here, we show that synonymous sequence warrants consideration alongside these other variables  
371 by highlighting its impact on the realisation of highly repeatable evolution.

372

373

## 374 **Materials and Methods**

### 375 **Model System**

376 Our model system employs strains of the soil microbe *P. fluorescens* SBW25 and Pf0-1 that lack  
377 motility through partial gene deletion or disruption of *fleQ*, the master regulator of flagellar motility  
378 (Robleto et al. 2003; Alsohim et al. 2014). Motility can be recovered in the absence of *fleQ* following  
379 *de novo* mutation that allows for the recruitment of a homologous response regulator, of which the most  
380 readily targeted is *ntrC* of the nitrogen regulatory pathway. The initial mutation that facilitates *ntrC*  
381 recruitment occurs in other loci in the nitrogen pathway, resulting in the hyper-phosphorylation of *ntrC*  
382 (Taylor et al. 2015). Two SBW25-derived strains were used as ancestors in this study: SBW25  $\Delta$ *fleQ*  
383 (hereafter  $\Delta$ *fleQ*) and a  $\Delta$ *fleQ* variant with a functional *viscB* knockout isolated from a transposon  
384 library (SBW25 $\Delta$ *fleQ* IS- $\Omega$ Km-hah: PFLU2552, hereafter AR2; Alsohim *et al.*, 2014).  $\Delta$ *fleQ* can  
385 migrate on soft agar (0.25%) prior to mutation via a form of sliding motility, which is owed to the  
386 strain's ability to produce viscosin. AR2 cannot produce viscosin and is thus rendered completely  
387 immotile prior to mutation. Pf0-1 is a native *gacA* mutant (Seaton et al. 2013) thus does not make  
388 viscosin, therefore its  $\Delta$ *fleQ* variant, Pf0-2x, is rendered completely immotile following disruption of  
389 *fleQ*. All cells were grown at 27°C and all strains used throughout the study (ancestral, evolved and  
390 engineered) were stored at -80°C in 20% glycerol. The nutrient conditions used throughout the work  
391 were lysogeny broth (LB) and M9 minimal media containing glucose and 7.5 mM NH<sub>4</sub>. The minimal  
392 media was used in isolation or supplemented with either glutamate (M9+glu) or glutamine (M9+gln) at  
393 a final supplement concentration of 8 mM unless stated otherwise.

### 394 **Motility Selection Experiment**

395 Immotile variants were placed under selection for flagella-mediated motility using LB and M9 soft agar  
396 (0.25%) motility plates. Details of agar preparation are described in Alsohim et al., 2014. Supplemented  
397 concentrations of glutamate (glu)/glutamine (gln) in M9 soft agar were expanded to include final  
398 concentrations at 4 mM, 8 mM and 16 mM, as it was observed that biosurfactant-mediated dendritic  
399 motility in  $\Delta$ *fleQ* lines was enhanced at higher supplement concentrations, which masked any emergent  
400 blebs (data not shown). Lowering the gln supplement concentration improved the likelihood of  
401 observing an emergent flagella bleb in M9+gln motility plates (16 mM: 4/12, 8 mM: 9/20, 4 mM: 7/12  
402 independent lines). However, dendritic motility remained high on all supplements of M9+glu and  
403 persistently masked blebbing (16 mM: 2/12, 8 mM: 3/20, 4 mM: 2/11 independent lines). Although  
404 gln/glu supplementation had no bearing on motility in AR2 lines, supplement conditions across both  
405 gln/glu were expanded for consistency. Single clonal colonies were inoculated into the centre of the  
406 agar using a sterile pipette tip and monitored daily until emergence of motile bleb zones (as visualised  
407 in fig. 1A). Samples were isolated from the leading edge, selecting for the strongest motility phenotype  
408 on the plate, within 24 h of emergence and streaked onto LB agar (1.5%) to obtain a clonal sample. As

409 *ΔfleQ* lines were motile via dendritic movement prior to re-evolving flagella motility and could visually  
410 mask flagella-mediated motile zones, samples were left for 120 h prior to sampling from the leading  
411 edge of the growth. An exception was made in instances where blebbing motile zones were observed  
412 solely further within the growth area, in which case this area was preferentially sampled.

### 413 **Sequencing**

414 Motility-facilitating changes were determined through PCR amplification and sequencing of *ntrB*, *glnK*  
415 and *glnA* genes (supplementary table S1). Polymerase chain reaction (PCR) products and plasmids were  
416 purified using Monarch® PCR & DNA Cleanup Kit (New England Biolabs) and Sanger sequencing  
417 was performed by Eurofins Genomics. A subset of AR2 samples evolved on different nutritional  
418 backgrounds was additionally screened through Illumina Whole-Genome Sequencing by the Milner  
419 Genomics Centre and MicrobesNG (LB: n = 5, M9: n = 6, M9+gln: n = 6, M9+glu: n = 7). This allowed  
420 us to screen for potential secondary mutations and to identify rare changes in motile strains with  
421 wildtype *ntrB* sequences. *P. fluorescens* SBW25 genome was used as an assembly template (NCBI  
422 Assembly: ASM922v1, GenBank sequence: AM181176.4) and single nucleotide polymorphisms were  
423 called using Snippy with default parameters (Seemann 2015) through the Cloud Infrastructure for  
424 Microbial Bioinformatics (CLIMB; Connor *et al.*, 2016). In instances where coverage at the called site  
425 was low ( $\leq 10x$ ), called changes were confirmed by Sanger sequencing.

### 426 **Soft Agar Motility Assay**

427 Cryopreserved samples of AR2 and derived *ntrB* mutants were streaked and grown for 48 h on LB agar  
428 (1.5%). Three colonies were then picked, inoculated in LB broth and grown overnight at an agitation of  
429 180 rpm to create biological triplicates for each sample. Overnight cultures were pelleted via  
430 centrifugation, their supernatant withdrawn and the cell pellets re-suspended in phosphate buffer saline  
431 (PBS) to a final concentration of OD1 cells/ml. 1  $\mu$ l of each replicate was inoculated into soft-agar by  
432 piercing the top of the agar with the pipette tip and ejecting the culture into the cavity as the tip was  
433 withdrawn. Plates were incubated for 48 h and photographed. Diameters of concentric circle growths  
434 were calculated laterally and longitudinally, allowing us to calculate an averaged total surface area using  
435  $A = \pi r^2$ . This process was repeated as several independent lines underwent a second-step mutation  
436 (Taylor *et al.* 2015) within the 48 h assay. This phenotype was readily observable as a blebbing that  
437 appeared at the leading edge along a segment of the circumference, distorting the expected concentric  
438 circle of a clonal migrating population. As such these plates were discarded from the study. By  
439 completing additional sets of biological triplicates, we ensured that each sample had at least three  
440 biological replicates for analysis.

### 441 **Invasion Assay**



442 OD-corrected biological quadruplets of both *ntrB* mutant lines were prepared as outlined above. For  
443 each pair of biological replicates, 1  $\mu$ l of *ntrB* A683C was first inoculated as outlined above and  
444 incubated, followed by *ntrB* A289C's inoculation into the same cavity after the allotted time had elapsed  
445 (0 h, 3 h, 6 h, 9 h and 12 h). When inoculated at 0 h, *ntrB* A289C was added to the plate immediately  
446 after *ntrB* A683C. In instances where *ntrB* A289C was added to the plate  $\leq$ 6 h after *ntrB* A683C,  
447 overgrowth of culture was avoided by incubating *ntrB* A289C cultures at 22°C at 0 h until cell pelleting  
448 and re-suspension approximately 1 h prior to inoculation. When *ntrB* A289C cultures were added to the  
449 plate  $\geq$ 9 h after *ntrB*-A683C culture, overgrowth of culture was avoided by diluting the culture of *ntrB*-  
450 A289C 100-fold into fresh LB broth at 0 h. The same 'angle of attack' was used for both instances of  
451 inoculation (i.e. the side of the plate that the pipette tip travelled over on its way to the centre), as small  
452 volumes of fluid falling from the tip onto the plate could cause local satellite growth. To avoid the risk  
453 of satellite growths affecting results, isolated samples were collected from the leading edge 180° from  
454 the angle of attack after a period of 24 h. The *ntrB* locus of one sample per replicate was determined by  
455 Sanger sequencing to establish the dominant genotype at the growth frontier.

#### 456 **Genetic engineering**

457 A pTS1 plasmid containing *ntrB* A683C was assembled using overlap extension PCR (oePCR) cloning  
458 (for detailed protocol see Bryksin and Matsumura, 2010) using vector pTS1 as a template. The *ntrB*  
459 synonymous mutants (AR2-sm and Pf0-2x-sm6) and AR2-sm *ntrB* A289C pTS1 plasmids were  
460 constructed using oePCR to assemble the insert sequence for allelic exchange, followed by  
461 amplification using nested primers and annealed into a pTS1 vector through restriction-ligation (for full  
462 primer list see supplementary table. S1). pTS1 is a suicide vector, able to replicate in *E. coli* but not  
463 *Pseudomonas*, and contains a tetracycline resistance cassette as well as an open reading frame encoding  
464 SacB. Cloned plasmids were introduced to *P. fluorescens* SBW25 strains via puddle mating conjugation  
465 with an auxotrophic *E. coli* donor strain ST18. Mutations were incorporated into the genome through  
466 two-step allelic exchange, using a method outline by Hmelo *et al.*, 2015, with the following adjustments:  
467 (i) *P. fluorescens* cells were grown at 27°C. (ii) An additional passage step was introduced prior to  
468 merodiploid selection, whereby colonies consisting of *P. fluorescens* cells that had incorporated the  
469 plasmid (merodiploids) were allowed to grow overnight in LB broth free from selection, granting extra  
470 generational time for expulsion of the plasmid from the genome. (iii) The overnight cultures were  
471 subsequently serially diluted and spot plated onto NSLB agar + 15% (wt/vol) sucrose for AR2 strains  
472 and NSLB agar + 5% (wt/vol) sucrose for the Pf0-2x strain. Positive mutant strains were identified  
473 through targeted Sanger sequencing of the *ntrB* locus. Merodiploids, which have gone through just one  
474 recombination event, will possess both mutant and wild type alleles of the target locus, as well as the  
475 *sacB* locus and a tetracycline resistance cassette. However the wild type allele, *sacB* and tetracycline  
476 resistance will be subsequently lost following successful two-step recombination. We therefore also  
477 screened these mutant strains for counter-selection escape through PCR-amplification and sequencing

478 of the *sacB* locus and growth on tetracycline. Mutants were only considered successful if there was no  
479 product on an agarose gel following amplification of *sacB* alongside appropriate controls, the lines were  
480 sensitive to tetracycline, and PCR results of the target locus reported expected changes at the targeted  
481 sites.

## 482 **Statistics**

483 All statistical tests and figures were produced in R (R Core Team 2014). Figures were created using the  
484 *ggplot* package (Wickham 2016). A simulated dataset was produced for the Bootstrap test by randomly  
485 drawing from a pool of 3 values with equal weights 24 times for 1 million iterations. Note that as the  
486 simulated dataset draws from a pool of 3 values, it encodes that no other mutational routes are possible  
487 aside from the observed 3. As such the derived statistic is an underestimate, with additional routes at  
488 any weight lowering the likelihood of repeat observations of a single value. All other tests were  
489 completed using functions in base-R aside from the Dunn test, which was performed using the *FSA*  
490 package (Ogle et al. 2020). Along with the Bootstrap test, the statistical tests used throughout the study  
491 were: Kruskal-Wallis chi-squared tests, Kruskal-Wallis post-hoc Dunn test, and Wilcoxon rank sum  
492 tests with continuity correction.

493

## 494 **Data availability:**

495 All raw data used for generation of this manuscript is publicly available and can be accessed at  
496 <https://github.com/J-S-Horton/Syn-sequence-parallel-evolution>.

497

## 498 **Acknowledgments and funding information**

499 We thank Laurence Hurst for comments on earlier versions of this manuscript. In addition we thank  
500 member of the Taylor lab Matthew Shepherd for insightful comments and discussion, and Mark Silby  
501 for contributing the ancestral *P. fluorescens* Pf0-2x strain used in the study. This work was supported  
502 by the University of Bath University Research Studentship Account (URSA) awarded to TBT and NKP;  
503 a Royal Society Dorothy Hodgkin Research Fellowship awarded to TBT (DH150169); and the JABBS  
504 Foundation for RWJ. Bioinformatics analysis of the paper was carried out using the Medical Research  
505 Council's (MRC) Cloud Infrastructure for Microbial Bioinformatics (CLIMB), and Illumina Whole-  
506 Genome Sequencing by the Milner Genomics Centre, Bath, UK and MicrobesNG, Birmingham, UK.

507

## 508 **References**

509 Alsohim AS, Taylor TB, Barrett GA, Gallie J, Zhang X, Altamirano-Junqueira AE, Johnson LJ,

- 510 Rainey PB, Jackson RW. 2014. The biosurfactant viscosin produced by *Pseudomonas*  
511 *fluorescens* SBW25 aids spreading motility and plant growth promotion. *Environ. Microbiol.*  
512 16:2267–2281.
- 513 Avrani S, Bolotin E, Katz S, Hershberg R. 2017. Rapid Genetic Adaptation during the First Four  
514 Months of Survival under Resource Exhaustion. *Mol. Biol. Evol.* 34:1758–1769.
- 515 Bailey SF, Blanquart F, Bataillon T, Kassen R. 2017. What drives parallel evolution?: How  
516 population size and mutational variation contribute to repeated evolution. *BioEssays* 39:1–9.
- 517 Bailey SF, Guo Q, Bataillon T. 2018. Identifying drivers of parallel evolution: A regression model  
518 approach. *Genome Biol. Evol.* 10:2801–2812.
- 519 Bailey SF, Rodrigue N, Kassen R. 2015. The effect of selection environment on the probability of  
520 parallel evolution. *Mol. Biol. Evol.* 32:1436–1448.
- 521 Barrett RDH, M’Gonigle LK, Otto SP. 2006. The distribution of beneficial mutant effects under  
522 strong selection. *Genetics* 174:2071–2079.
- 523 Blount ZD, Barrick JE, Davidson CJ, Lenski RE. 2012. Genomic analysis of a key innovation in an  
524 experimental *Escherichia coli* population. *Nature* 489:513–518.
- 525 De Boer JG, Ripley LS. 1984. Demonstration of the production of frameshift and base-substitution  
526 mutations by quasipalindromic DNA sequences.
- 527 Bryksin A V, Matsumura I. 2010. Overlap extension PCR cloning: a simple and reliable way to create  
528 recombinant plasmids. *Biotechniques* 48:463–465.
- 529 Bull JJ, Badgett MR, Wichman HA, Huehenbeck JP, Hillis DM, Gulati A, Ho C, Molineux IJ. 1997.  
530 Exceptional Convergent Evolution in a Virus. *Genetics* 147:1497–1507.
- 531 Connor TR, Loman NJ, Thompson S, Smith A, Southgate J, Poplawski R, Bull MJ, Richardson E,  
532 Ismail M, Elwood-Thompson S, et al. 2016. CLIMB (the Cloud Infrastructure for Microbial  
533 Bioinformatics): an online resource for the medical microbiology community. *Microb.*  
534 *Genomics* 2:6.
- 535 Van Ditmarsch D, Boyle KE, Sakhtah H, Oyler JE, Carey D, Déziel É, Dietrich LEP, Xavier JB.  
536 2013. Convergent Evolution of Hyperswarming Leads to Impaired Biofilm Formation in  
537 Pathogenic Bacteria. *Cell Rep* 4:697–708.
- 538 Dong F, Allawi HT, Anderson T, Neri BP, Lyamichev VI. 2001. Secondary structure prediction and  
539 structure-specific sequence analysis of single-stranded DNA. *Nucleic Acids Res.* 29:3248–3257.
- 540 Duan C, Huan Q, Chen X, Wu S, Carey LB, He X, Qian W. 2018. Reduced intrinsic DNA curvature

- 541 leads to increased mutation rate. *Genome Biol.* 19:1–12.
- 542 Eyre-Walker A, Hurst LD. 2001. The evolution of isochores. *Nat. Rev. Genet.* 2:549–555.
- 543 Fieldhouse D, Golding B. 1991. A source of small repeats in genomic DNA. *Genetics* 129:563–572.
- 544 Fong SS, Joyce AR, Palsson BØ. 2005. Parallel adaptive evolution cultures of *Escherichia coli* lead to  
545 convergent growth phenotypes with different gene expression states. *Genome Res.*:1365–1372.
- 546 Fraebel DT, Mickalide H, Schnitkey D, Merritt J, Kuhlman TE, Kuehn S. 2017. Environment  
547 determines evolutionary trajectory in a constrained phenotypic space. *Elife* 6:e24669.
- 548 Frumkin I, Lajoie MJ, Gregg CJ, Hornung G, Church GM, Pilpel Y. 2018. Codon usage of highly  
549 expressed genes affects proteome-wide translation efficiency. *Proc. Natl. Acad. Sci. U. S. A.*  
550 115:E4940–E4949.
- 551 Galen SC, Natarajan C, Moriyama H, Weber RE, Fago A, Benham PM, Chavez AN, Cheviron ZA,  
552 Storz JF, Witt CC. 2015. Contribution of a mutational hot spot to hemoglobin adaptation in  
553 high-altitude Andean house wrens. *Proc. Natl. Acad. Sci. U. S. A.* 112:13958–13963.
- 554 Gillespie JH. 1984. Molecular Evolution Over the Mutational Landscape. *Evolution (N. Y.)* 38:1116.
- 555 Hermisson J, Pennings PS. 2005. Soft sweeps: Molecular population genetics of adaptation from  
556 standing genetic variation. *Genetics* 169:2335–2352.
- 557 Herron MD, Doebeli M. 2013. Parallel Evolutionary Dynamics of Adaptive Diversification in  
558 *Escherichia coli*. *PLoS Biol.* 11:e1001490.
- 559 Hmelo LR, Borlee BR, Almblad H, Love ME, Randall TE, Tseng BS, Lin CY, Irie Y, Storek KM,  
560 Yang JJ, et al. 2015. Precision-engineering the *Pseudomonas aeruginosa* genome with two-step  
561 allelic exchange. *Nat. Protoc.* 10:1820–1841.
- 562 Huang S, Pang L. 2012. Comparing statistical methods for quantifying drug sensitivity based on in  
563 vitro dose-response assays. *Assay Drug Dev. Technol.* 10:88–96.
- 564 Kram KE, Geiger C, Ismail WM, Lee H, Tang H, Foster PL, Finkel SE. 2017. Adaptation of  
565 *Escherichia coli* to Long-Term Serial Passage in Complex Medium: Evidence of Parallel  
566 Evolution. *mSystems* 2:1–12.
- 567 Kristofich J, Morgenthaler AB, Kinney WR, Ebmeier CC, Snyder DJ, Old WM, Cooper VS, Copley  
568 SD. 2018. Synonymous mutations make dramatic contributions to fitness when growth is limited  
569 by a weak-link enzyme. Matic I, editor. *PLOS Genet.* [Internet] 14:e1007615. Available from:  
570 <https://dx.plos.org/10.1371/journal.pgen.1007615>
- 571 Krug J. 2019. Accessibility percolation in random fitness landscapes. *bioRxiv* [Internet]. Available

- 572 from: <http://arxiv.org/abs/1903.11913>
- 573 Kudla G, Murray AW, Tollervey D, Plotkin JB. 2009. Coding-sequence determinants of gene  
574 expression in *Escherichia coli*. *Science* (80-. ). [Internet] 324:255–258. Available from:  
575 <https://www.ncbi.nlm.nih.gov/pmc/articles/PMC3624763/pdf/nihms412728.pdf>
- 576 Lässig M, Mustonen V, Walczak AM. 2017. Predicting evolution. *Nat. Ecol. Evol.* [Internet] 1:1–9.  
577 Available from: <http://dx.doi.org/10.1038/s41559-017-0077>
- 578 Lebeuf-Taylor E, McCloskey N, Bailey SF, Hinz A, Kassen R. 2019. The distribution of fitness  
579 effects among synonymous mutations in a gene under selection. *Elife* [Internet]:e45952.  
580 Available from: <https://doi.org/10.7554/eLife.45952.001>
- 581 Lind PA, Andersson DI. 2008. Whole-genome mutational biases in bacteria. *Proc. Natl. Acad. Sci. U.*  
582 *S. A.* [Internet] 105:17878–17883. Available from: [www.pnas.org/cgi/content/full/](http://www.pnas.org/cgi/content/full/)
- 583 Lind PA, Farr AD, Rainey PB. 2015. Experimental evolution reveals hidden diversity in evolutionary  
584 pathways. *Elife* 4.
- 585 Lind PA, Libby E, Herzog J, Rainey PB. 2019. Predicting mutational routes to new adaptive  
586 phenotypes. *Elife* [Internet] 8:e38822. Available from:  
587 <https://www.ncbi.nlm.nih.gov/pubmed/30616716>
- 588 Long H, Sung W, Miller SF, Ackerman MS, Doak TG, Lynch M. 2014. Mutation rate, spectrum,  
589 topology, and context-dependency in the DNA mismatch repair-deficient *Pseudomonas*  
590 *fluorescens* ATCC948. *Genome Biol. Evol.* 7:262–271.
- 591 M. Kimura. 1968. Evolutionary Rate at the Molecular Level. *Nature* [Internet] 217:624–626.  
592 Available from: [https://www-nature-com.remote.library.osaka-](https://www-nature-com.remote.library.osaka-u.ac.jp:8443/articles/217624a0.pdf)  
593 [u.ac.jp:8443/articles/217624a0.pdf](https://www-nature-com.remote.library.osaka-u.ac.jp:8443/articles/217624a0.pdf)
- 594 Markham NR, Zuker M. 2005. DINAMelt web server for nucleic acid melting prediction. *Nucleic*  
595 *Acids Res.* 33:577–581.
- 596 McDonald MJ, Gehrig SM, Meintjes PL, Zhang XX, Rainey PB. 2009. Adaptive divergence in  
597 experimental populations of *Pseudomonas fluorescens*. IV. Genetic constraints guide  
598 evolutionary trajectories in a parallel adaptive radiation. *Genetics* 183:1041–1053.
- 599 Mcgee LW, Sackman AM, Morrison AJ, Pierce J, Anisman J, Rokyta DR. 2016. Synergistic  
600 Pleiotropy Overrides the Costs of Complexity in Viral Adaptation. *Genetics* 202:285–295.
- 601 McGrath PT, Xu Y, Ailion M, Garrison JL, Butcher RA, Bargmann CI. 2011. Parallel evolution of  
602 domesticated *Caenorhabditis* species targets pheromone receptor genes. *Nature* 477:321–325.

- 603 Merrikh CN, Merrikh H. 2018. Gene inversion potentiates bacterial evolvability and virulence. *Nat.*  
604 *Commun.* 9:10.
- 605 Meyer JR, Dobias DT, Weitz JS, Barrick JE, Quick RT, Lenski RE. 2012. Repeatability and  
606 contingency in the evolution of a key innovation in phage lambda. *Science* (80- ). [Internet]  
607 335:428–432. Available from: <http://science.sciencemag.org/>
- 608 Miller C, Kong J, Tran TT, Arias CA, Saxer G, Shamooy Y. 2013. Adaptation of *Enterococcus faecalis*  
609 to daptomycin reveals an ordered progression to resistance. *Antimicrob. Agents Chemother.*  
610 57:5373–5383.
- 611 Notley-McRobb L, Ferenci T. 1999. Adaptive *mgl*-regulatory mutations and genetic diversity  
612 evolving in glucose-limited *Escherichia coli* populations. *Environ. Microbiol.* 1:33–43.
- 613 Ogle DH, Wheeler P, Dinno A. 2020. FSA: Fisheries Stock Analysis. Available from:  
614 <https://github.com/droglenc/FSA>
- 615 Orr HA. 2005. THE PROBABILITY OF PARALLEL EVOLUTION. *Evolution* (N. Y). 59:216.
- 616 Ostrowski EA, Woods RJ, Lenski RE. 2008. The genetic basis of parallel and divergent phenotypic  
617 responses in evolving populations of *Escherichia coli*. *Proc. R. Soc. B Biol. Sci.* 275:277–284.
- 618 R Core Team. 2014. R: A language and environment for statistical computing. *R Found. Stat.*  
619 *Comput. Vienna, Austria* [Internet]. Available from: <http://www.r-project.org/>.
- 620 Riehle MM, Bennett AF, Long AD. 2001. Genetic architecture of thermal adaptation in *Escherichia*  
621 *coli*. *Proc. Natl. Acad. Sci. U. S. A.* [Internet] 98:525–530. Available from:  
622 [www.pnas.org](http://www.pnas.org)[doi10.1073/pnas.021448998](https://doi.org/10.1073/pnas.021448998)
- 623 Ripley LS. 1982. Model for the participation of quasi-palindromic DNA sequences in frameshift  
624 mutation. *Proc. Natl. Acad. Sci. U. S. A.* 79:4128–4132.
- 625 Robleto EA, López-Hernández I, Silby MW, Levy SB. 2003. Genetic analysis of the *AdnA* regulon in  
626 *Pseudomonas fluorescens*: Nonessential role of flagella in adhesion to sand and biofilm  
627 formation. *J. Bacteriol.* 185:453–460.
- 628 Sackman AM, McGee LW, Morrison AJ, Pierce J, Anisman J, Hamilton H, Sanderbeck S, Newman  
629 C, Rokyta DR. 2017. Mutation-driven parallel evolution during viral adaptation. *Mol. Biol. Evol.*  
630 34:3243–3253.
- 631 Seaton SC, Silby MW, Levy SB. 2013. Pleiotropic effects of *gaca* on *pseudomonas fluorescens* pf0-1  
632 in vitro and in soil. *Appl. Environ. Microbiol.* 79:5405–5410.
- 633 Seemann T. 2015. Snippy: fast bacterial variant calling from NGS reads. Available from:



- 634 <https://github.com/tseemann/snippy>
- 635 Sekowska A, Wendel S, Fischer EC, Nørholm MHH. 2016. Generation of mutation hotspots in ageing  
636 bacterial colonies. *Sci. Rep.* 6:4–10.
- 637 Spor A, Kvitek DJ, Nidelet T, Martin J, Legrand J, Dillmann C, Bourgeois A, De Vienne D, Sherlock  
638 G, Sicard D. 2014. Phenotypic and genotypic convergences are influenced by historical  
639 contingency and environment in yeast. *Evolution (N. Y.)*. 68:772–790.
- 640 Stoltzfus A, McCandlish DM. 2017. Mutational biases influence parallel adaptation. *Mol. Biol. Evol.*  
641 34:2163–2172.
- 642 Taylor TB, Mulley G, Dills AH, Alsohim AS, McGuffin LJ, Studholme DJ, Silby MW, Brockhurst  
643 MA, Johnson LJ, Jackson RW. 2015. Evolutionary resurrection of flagellar motility via rewiring  
644 of the nitrogen regulation system. *Science (80-. )*. 347:1014–1017.
- 645 Tenaille O, Rodríguez-Verdugo A, Gaut RL, McDonald P, Bennett AF, Long AD, Gaut BS. 2012.  
646 The molecular diversity of adaptive convergence. *Science (80-. )*. 335:457–461.
- 647 Trevino V. 2020. HotSpotAnnotations — a database for hotspot mutations and annotations in cancer.  
648 *Database*:1–8.
- 649 Turner CB, Marshall CW, Cooper VS. 2018. Parallel genetic adaptation across environments differing  
650 in mode of growth or resource availability. *Evol. Lett.* 2:355–367.
- 651 Vogwill T, Kojadinovic M, Furió V, Maclean RC. 2014. Testing the role of genetic background in  
652 parallel evolution using the comparative experimental evolution of antibiotic resistance. *Mol.*  
653 *Biol. Evol.* 31:3314–3323.
- 654 Weber S, Ramirez C, Doerfler W. 2020. Signal hotspot mutations in SARS-CoV-2 genomes evolve as  
655 the virus spreads and actively replicates in different parts of the world. *Virus Res.* [Internet]  
656 289:198170. Available from: <https://doi.org/10.1016/j.virusres.2020.198170>
- 657 Weinreich DM, Delaney NF, De Pristo MA, Hartl DL. 2006. Darwinian Evolution Can Follow Only  
658 Very Few Mutational Paths to Fitter Proteins. *Science (80-. )*. 312.
- 659 Wichman HA, Badgett MR, Scott LA, Boulianne CM, Bull JJ. 1999. Different trajectories of parallel  
660 evolution during viral adaptation. *Science (80-. )*. 285:422–424.
- 661 Wickham H. 2016. ggplot2: Elegant Graphics for Data Analysis. :ISBN 978-3-319-24277-4.  
662 Available from: <https://ggplot2.tidyverse.org>
- 663 Wood TE, Burke JM, Rieseberg LH. 2005. Parallel genotypic adaptation: When evolution repeats  
664 itself. *Genetica* 123:157–170.

665 Woods R, Schneider D, Winkworth CL, Riley MA, Lenski RE. 2006. Tests of parallel molecular  
666 evolution in a long-term experiment with *Escherichia coli*. *Proc. Natl. Acad. Sci. U. S. A.*  
667 103:9107–9112.

668 Wright BE, Reschke DK, Schmidt KH, Reimers JM, Knight W. 2003. Predicting mutation  
669 frequencies in stem-loop structures of derepressed genes: Implications for evolution. *Mol.*  
670 *Microbiol.* 48:429–441.

671

672

673 **Figures and figure legends:**

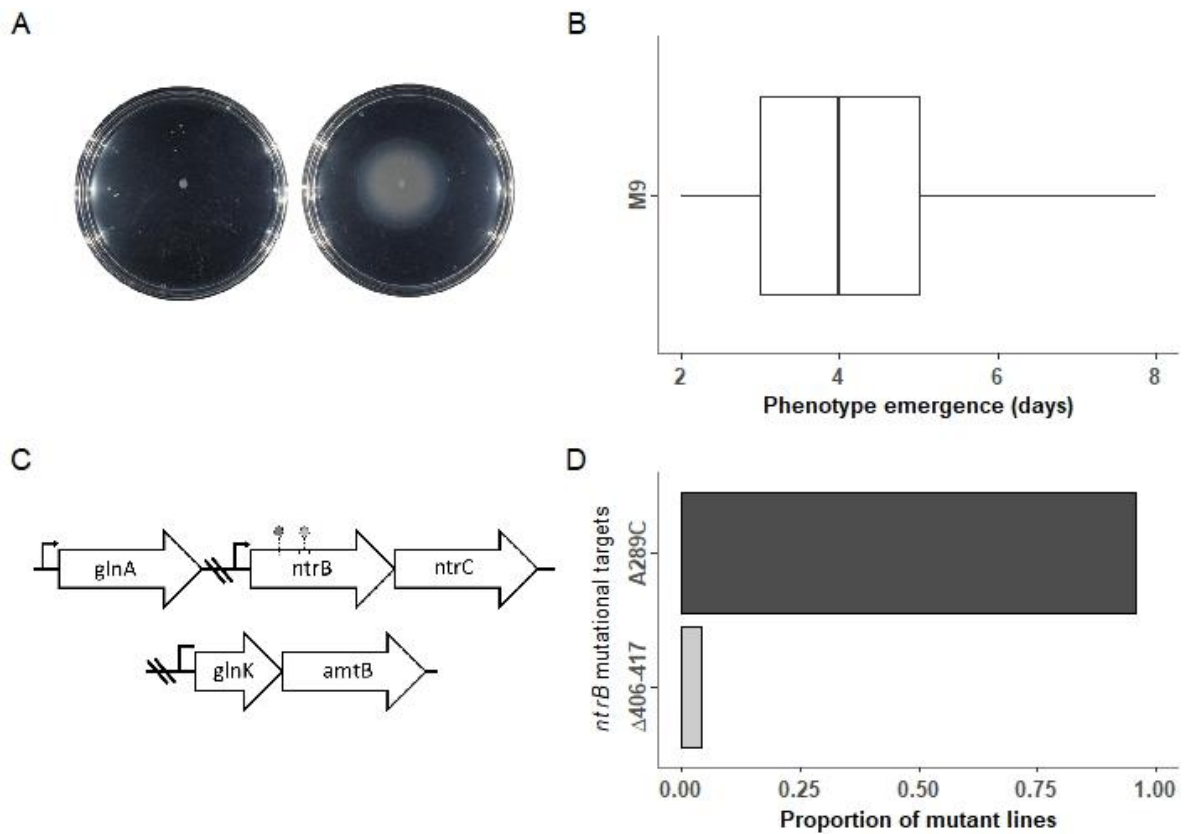

674

675 Fig. 1. Highly repeatable evolution of flagella-mediated motility in immotile variants of *P. fluorescens*  
676 SBW25 (AR2). (A) Immotile populations evolved on soft agar (left) re-evolved flagella-mediated  
677 motility through one-step *de novo* mutation (right). (B) Phenotype emergence appeared rapidly,  
678 typically within 3-5 days following inoculation (box edges represent the 25<sup>th</sup> and 75<sup>th</sup> percentiles and  
679 the whiskers show the observed range). (C) The underlying genetic changes were highly parallel, with  
680 all independent lines targeting one of two sites (left circle, A289C and right circle Δ406-417) within the  
681 *ntrB* locus at the expense of other sites within the nitrogen (*ntr*) pathway. (D) A single transversion  
682 mutation, A289C, was the most common mutational route, appearing in over 95% of independent lines  
683 (23/24).

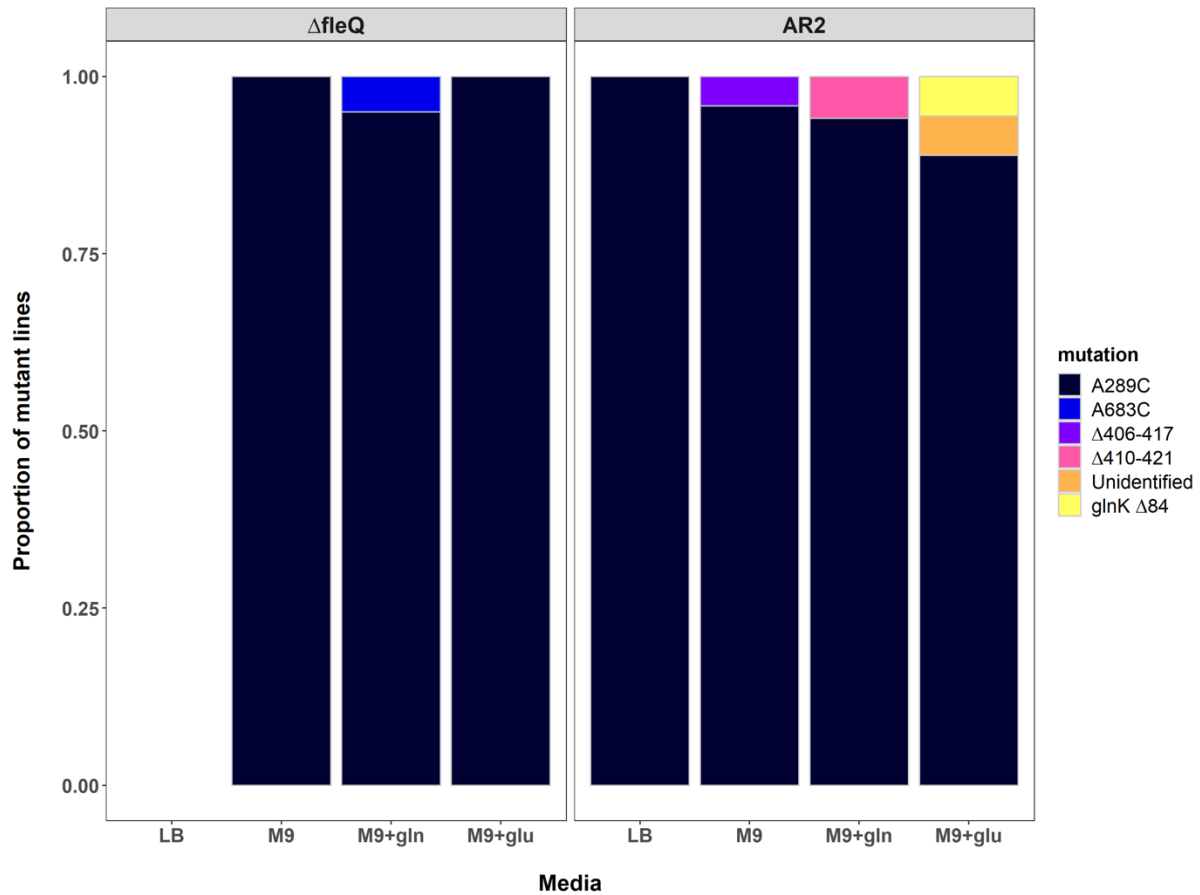

684

685 Fig. 2. Repeatability of the A289C *ntrB* mutation across genetic background and nutrient environment  
686 (total  $N = 116$ ). The proportion of each observed mutation is shown on the y axis. *ntrB* mutation A289C  
687 was robust across both strain backgrounds (*SBW25* $\Delta fleQ$  shown as  $\Delta fleQ$ , and AR2) and the four tested  
688 nutritional environments, remaining the primary target of mutation in all cases (>87%). Lines were  
689 evolved using 4mM, 8mM and 16mM of amino acid supplement (see materials and methods). No  
690 significant relationship between supplement concentration and evolutionary target was observed  
691 (Kruskal-Wallis chi-squared tests: AR2 M9+glu,  $df = 2$ ,  $P > 0.2$ ; AR2 M9+gln,  $df = 1$ ,  $P > 0.23$ ;  $\Delta fleQ$   
692 M9+gln,  $df = 1$ ,  $P > 0.3$ ), as such they are treated as independent treatments for statistical analysis but  
693 visually grouped here for convenience.  $\Delta fleQ$  lines evolved on LB were able to migrate rapidly through  
694 sliding motility alone, masking any potential emergent flagellate blebs (see Alsohim et al., 2014).  
695 Sample sizes ( $N$ ) for other categorical variables:  $\Delta fleQ$  – M9: 25, M9+gln: 20, M9+glu: 7; AR2 - LB:  
696 5, M9: 24, M9+gln: 17, M9+glu: 18.

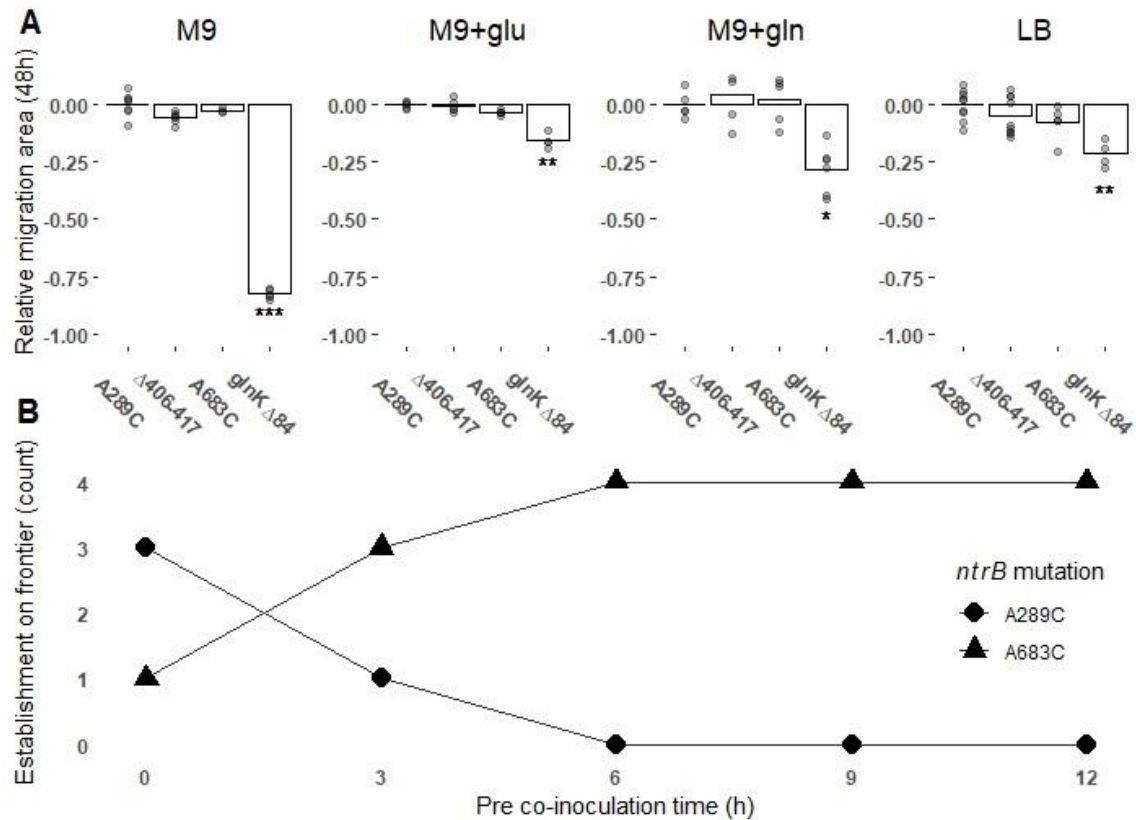

697

698 Fig. 3. Selection does not strongly favour *ntrB* A289C motility over alternative *ntrB* mutations. (A)  
 699 Surface area of motile zones following 48h of growth across four environmental conditions. Individual  
 700 data points from biological replicates are plotted and each migration area has been standardised against  
 701 the surface area of a *ntrB* A289C mutant grown in the same environment (*ntrB* A289C growth mean =  
 702 0). Significance values: \* =  $P < 0.05$ , \*\* =  $P < 0.01$  (Kruskal-Wallis post-hoc Dunn test). (B) *ntrB*  
 703 A289C lines fail to reach the growth frontier within 6 h of competitor pre-inoculation. Two *ntrB* mutant  
 704 lines, A289C and A683C, were co-inoculated in equal amounts on soft agar, either immediately (0 h)  
 705 or with A289C being added at 3 h time points up to 12 h (x-axis) into the centre of an A683C inoculated  
 706 zone. The strains were competed for 24 h prior to sampling from the motile zone's leading edge.  
 707 Genotype establishment at the frontier across the four replicates is shown on the y-axis with the number  
 708 of lineages at the leading edge represented as 0-4.

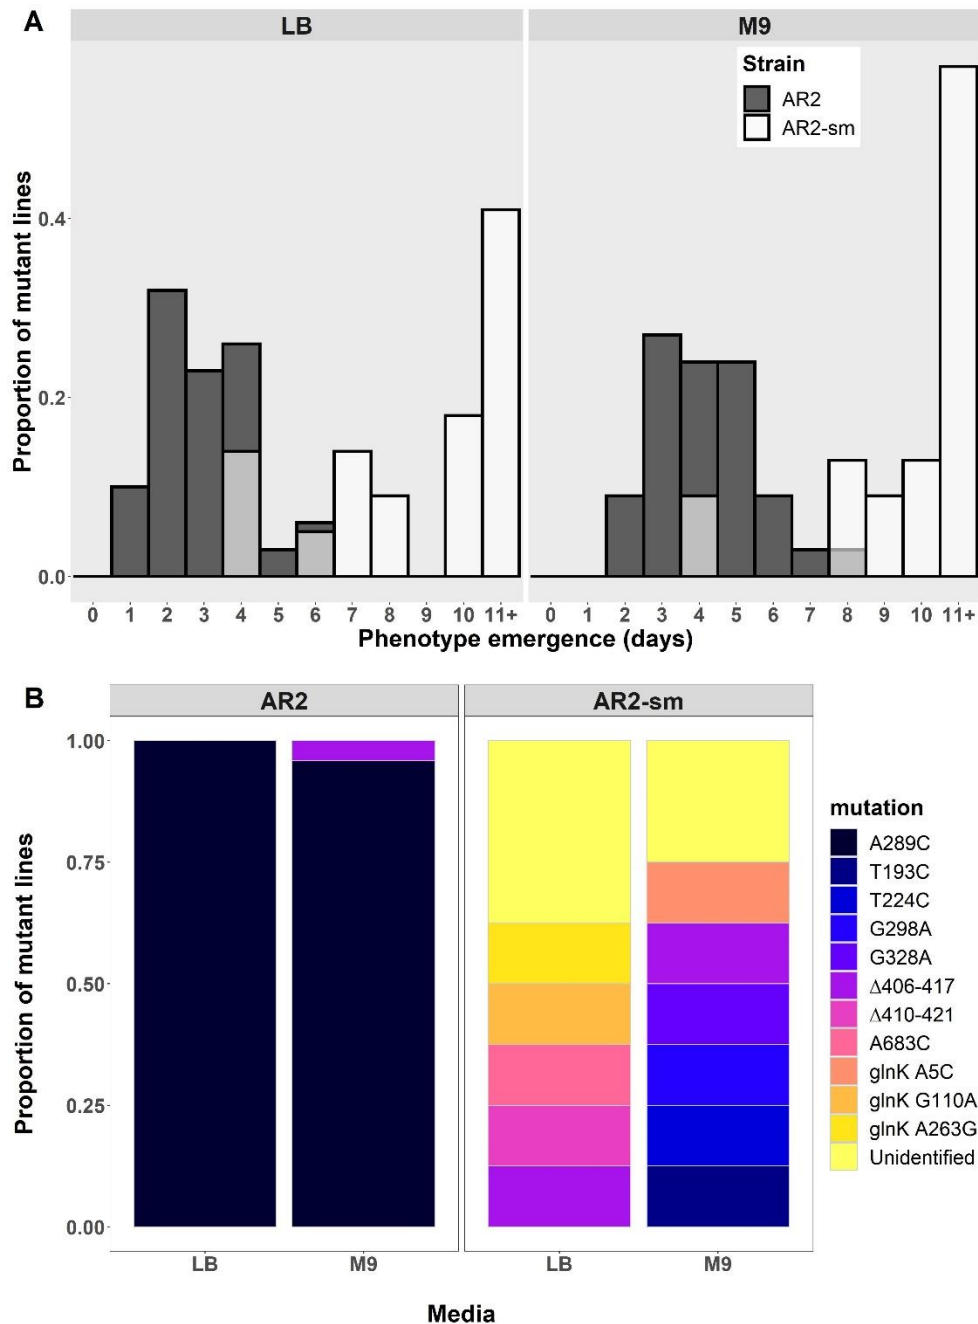

709

710 Fig. 4. Loss of repeatable evolution conferred by a synonymous sequence mutant (AR2-sm). (A)  
 711 Histogram of motility phenotype emergence times across independent replicates of immotile SBW25  
 712 (AR2) and an AR2 strain with 6 synonymous substitutions in the *nrB* locus (AR2-sm) in two nutrient  
 713 conditions. (B) Observed mutational targets across two environments (AR2: LB  $N = 5$ , M9  $N = 24$ ;  
 714 AR2-sm: LB  $N = 8$ , M9  $N = 8$ ). Note that characterised genotypes were sampled within 8 days of  
 715 experiment start date. Unidentified mutations could not be distinguished from wild type sequences of  
 716 genes belonging to the nitrogen regulatory pathway (*nrB*, *glnK* and *glnA*) which were analysed by  
 717 Sanger sequencing (supplementary table. S1). *nrB*  $\Delta 406-417$  was the only mutational target shared by  
 718 both lines within the same nutritional environment.



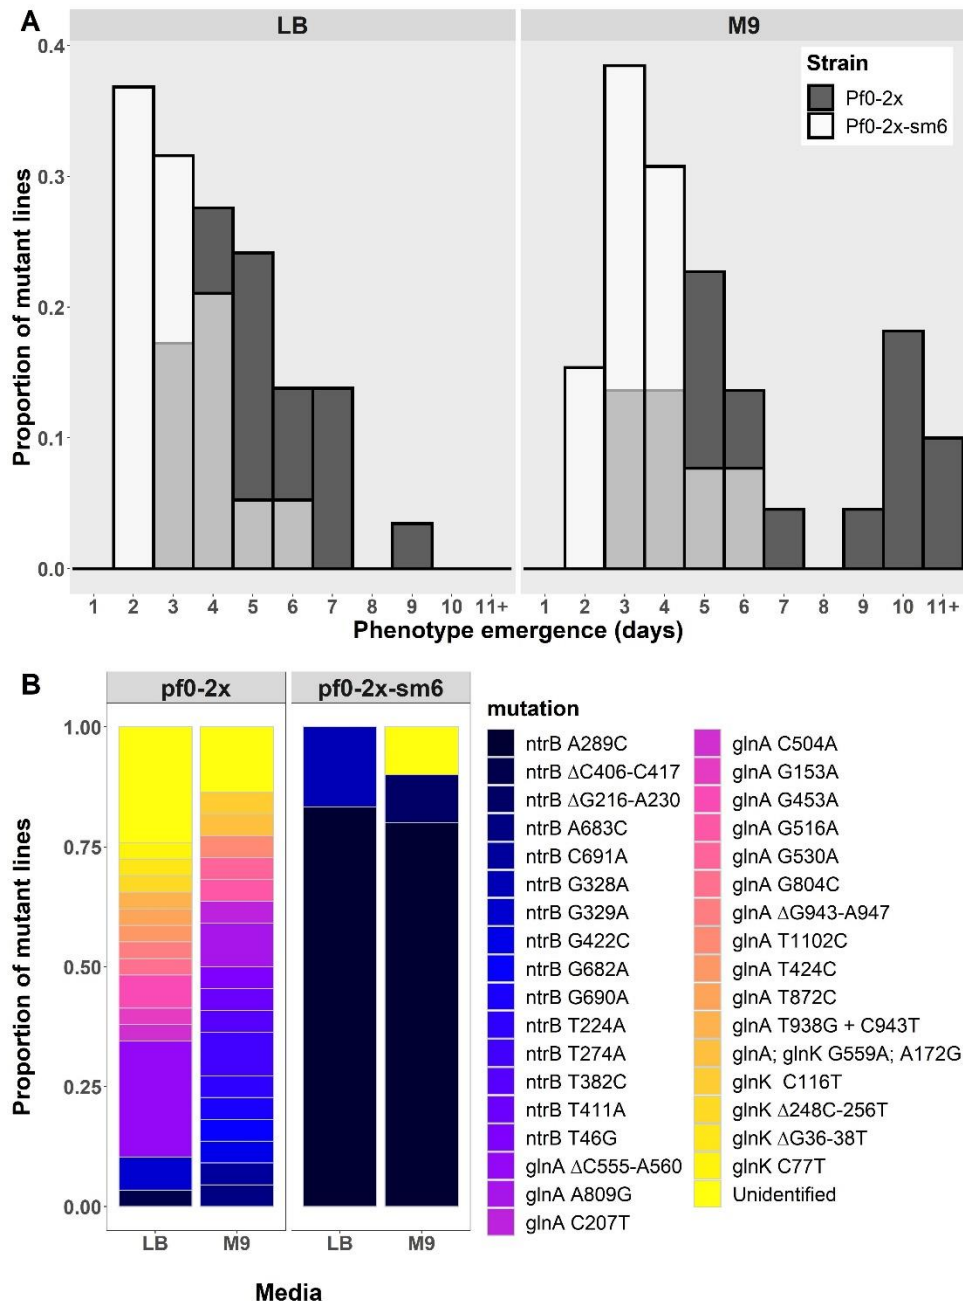

719

720 Fig. 5. Gain of repeatable evolution conferred by a synonymous sequence mutant (Pf0-2x-sm). (A)  
 721 Histogram of motility phenotype emergence times across independent replicates of an immotile variant  
 722 of *P. fluorescens* strain Pf0-1 (Pf0-2x; Taylor et al. 2015) and a Pf0-2x strain with 6 synonymous  
 723 substitutions in the *ntrB* locus (Pf0-2x-sm) in two nutrient conditions. (B) Observed mutational targets  
 724 across two environments (Pf0-2x: LB  $N = 29$ , M9  $N = 22$ ; Pf0-2x-sm: LB  $N = 6$ , M9  $N = 10$ ).  
 725 Unidentified mutations could not be distinguished from wild type sequences of genes belonging to the  
 726 nitrogen regulatory pathway (*ntrB*, *glnK* and *glnA*) which were analysed by Sanger sequencing  
 727 (supplementary table. S1). Mutation *ntrB* A289C was not observed in a single instance in evolved Pf0-  
 728 2x lines but became the strongly preferred target following synonymous substitution.

729 **Supplementary materials for “A mutational hotspot that determines highly repeatable evolution**  
730 **can be built and broken by silent genetic changes” by J .S. Horton et al:**

731 **Assessing Pleiotropy via Growth Rate**

732 Cryopreserved samples of AR2 and derived *ntrB* mutants were streaked and grown for 48 h on LB agar  
733 (1.5%). Three colonies were then picked, inoculated in LB broth and grown overnight at an agitation of  
734 180 rpm to create biological triplicates for each sample. This process was repeated with an independent  
735 batch of biological triplicates on a separate day to produce a total of 6 biological replicates for each  
736 sample. Overnight cultures were pelleted via centrifugation, their supernatant withdrawn and the cell  
737 pellets re-suspended in phosphate buffer saline (PBS) to a final concentration of OD1 cells/ml. The  
738 resuspension was subsequently diluted 100-fold into a 96-well plate (Costar®) containing nutrient broth.  
739 The plates were analysed in a Multiskan™ FC Microplate Photometer (Thermo Fisher Scientific) for  
740 24h, with autonomous OD readings every 10 min without agitation. Growth values were determined by  
741 calculating area under the curve using the trapezoidal rule (approach outlined in Huang and Pang, 2012).  
742 This allowed us to incorporate elements of the pleiotropic consequences to metabolism as well as the  
743 benefits of the motile swimming phenotype, including prolonged lag phases, steeper exponential phases  
744 and differing eventual yields achieved by mutant populations relative to the ancestral strain (growth  
745 curves not shown).

746 ***ntrB* loci analysis**

747 Theoretical hairpin stem-loop structures were generated using the *mfg* tool and methodology developed  
748 by Wright *et al.*, 2003. The *mfg* tool is used in conjunction with the Quikfold tool on the DINAMelt  
749 Web Server (Markham and Zuker 2005). Default parameters were used for Quikfold with the exception  
750 of temperature, which was amended to 27<sup>0</sup>C. The first 400 nucleotides of the open reading frames of  
751 *P. fluorescens* SBW25 *ntrB* and Pf0-1 *ntrB* were used as input sequences, and AR2-sm’s and Pf0-2x-  
752 sm’s input sequences were created by manually editing SBW25’s and Pf0-1’s *ntrB* sequence. The *mfg*  
753 application generates the most stable stem-loop structure for each base in which the selected base  
754 remains unpaired and so is at a higher likelihood of mutation. The window size of neighbouring  
755 nucleotides that are used to form the stem-loop structure can be adjusted, and a window length of 40  
756 nucleotides was used for the analysis in this study.

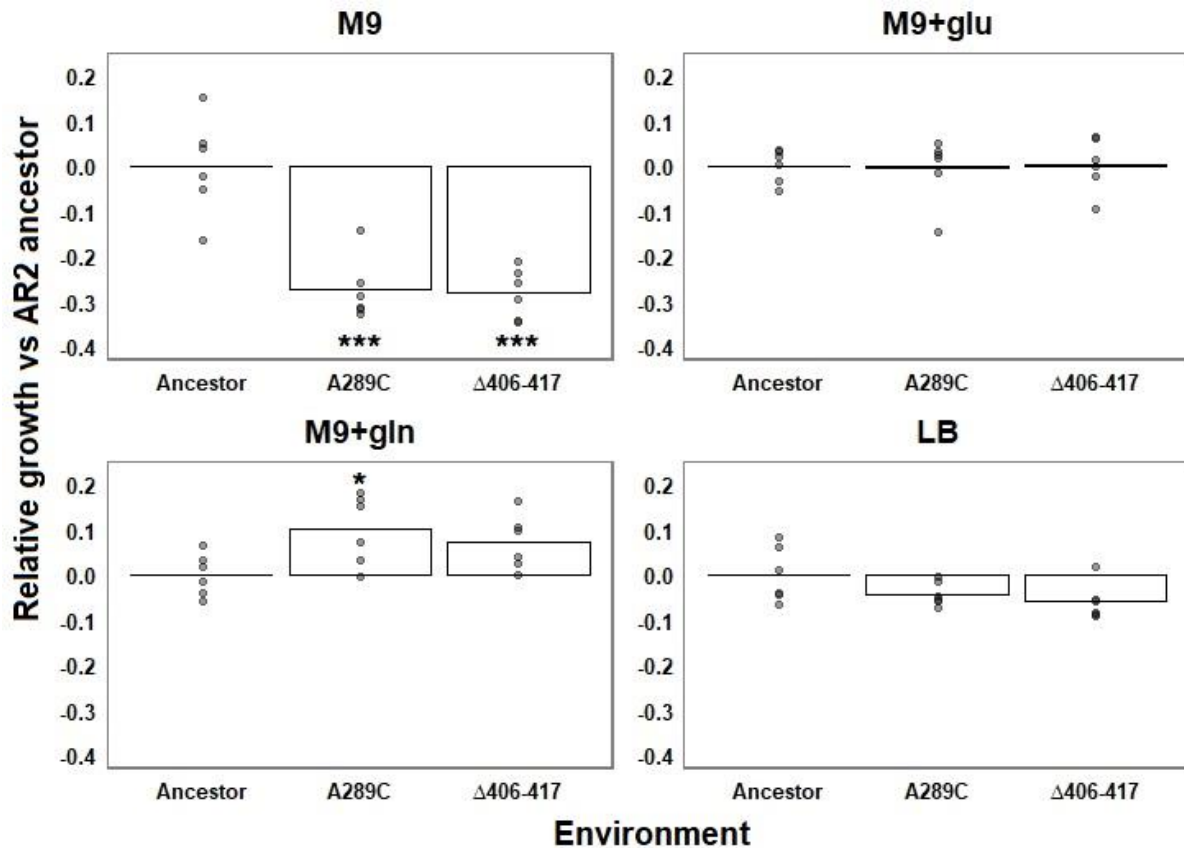

757

758 Fig. S1. Growth kinetics of mutant AR2 lines in static liquid culture over 24h. Nutrient environments:  
759 M9 = M9 minimal media supplemented with  $\text{NH}_4$  at 7.5 mM. M9+glu = additional glutamate added at  
760 8 mM. M9+gln = additional glutamine added at 8 mM. LB = lysogeny broth. Growth yield was  
761 determined using area under the curve, and each yield has been standardised against the yield of the  
762 AR2 ancestral strain grown in the same environment (AR2 ancestor growth mean = 0). Individual  
763 data points from biological replicates are plotted, and ranges around the mean growth of the ancestral  
764 strain are shown in column one of each frame. Plots are the means of six biological replicates.  
765 Significance values: \* =  $P < 0.05$ , \*\* =  $P < 0.01$ , \*\*\* =  $P < 0.001$  (one-way ANOVA post-hoc Tukey  
766 HSD test).

767

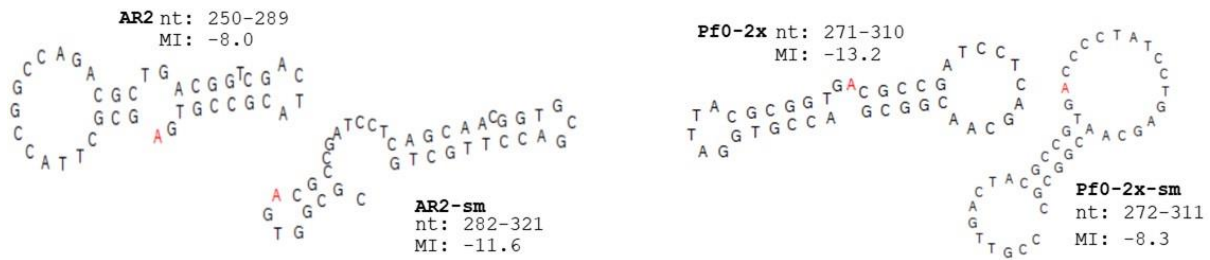

768

769 Fig. S2. Quasi-palindromic sequences flank *nrB* site 289 in both *P. fluorescens* SBW25 and Pf0-1  
770 derived strains. Theoretical hairpin formations were generated using the *mfg* program (Wright et al.  
771 2003). This software calculates the most stable hairpin formed between neighbouring tracts ( $\pm 40$   
772 nucleotides from site 289) in which the site of interest (in this case site 289, highlighted in red)  
773 remains unpaired. In these examples the nucleotides are forced into stem-loop structures that have  
774 been documented to comprise hairpins (Ripley, 1982). The stability, structure and included nucleotide  
775 tracts of the predicted hairpins differ between strains and determine the radiated nucleotide site's  
776 Mutational Index (MI): AR2 = -8.0. AR2-sm = -11.6, Pf0-2x = -13.2, Pf0-2x-sm = -8.3. These  
777 differences are partially owed to synonymous sequence variation as highlighted by the altered hairpin  
778 formation exhibited by AR2-sm and Pf0-2x-sm, who differ from their ancestors by 6 synonymous  
779 substitutions. AR2 and Pf0-2x-sm, the two strains that evolve in a highly parallel manner, share  
780 similar features that are absent in the other two strains. Namely their MI's are similar (-8.0 and -8.3)  
781 and the frequently radiated 'A' is located two nucleotides away from the base of a singular long,  
782 stable stem. As the *mfg* program only calls the most stable hairpin configuration it may miss  
783 alternative structures that temporarily form and raise mutation rate, however the tool exemplifies the  
784 power of synonymous variance in altering hairpin stability.

785

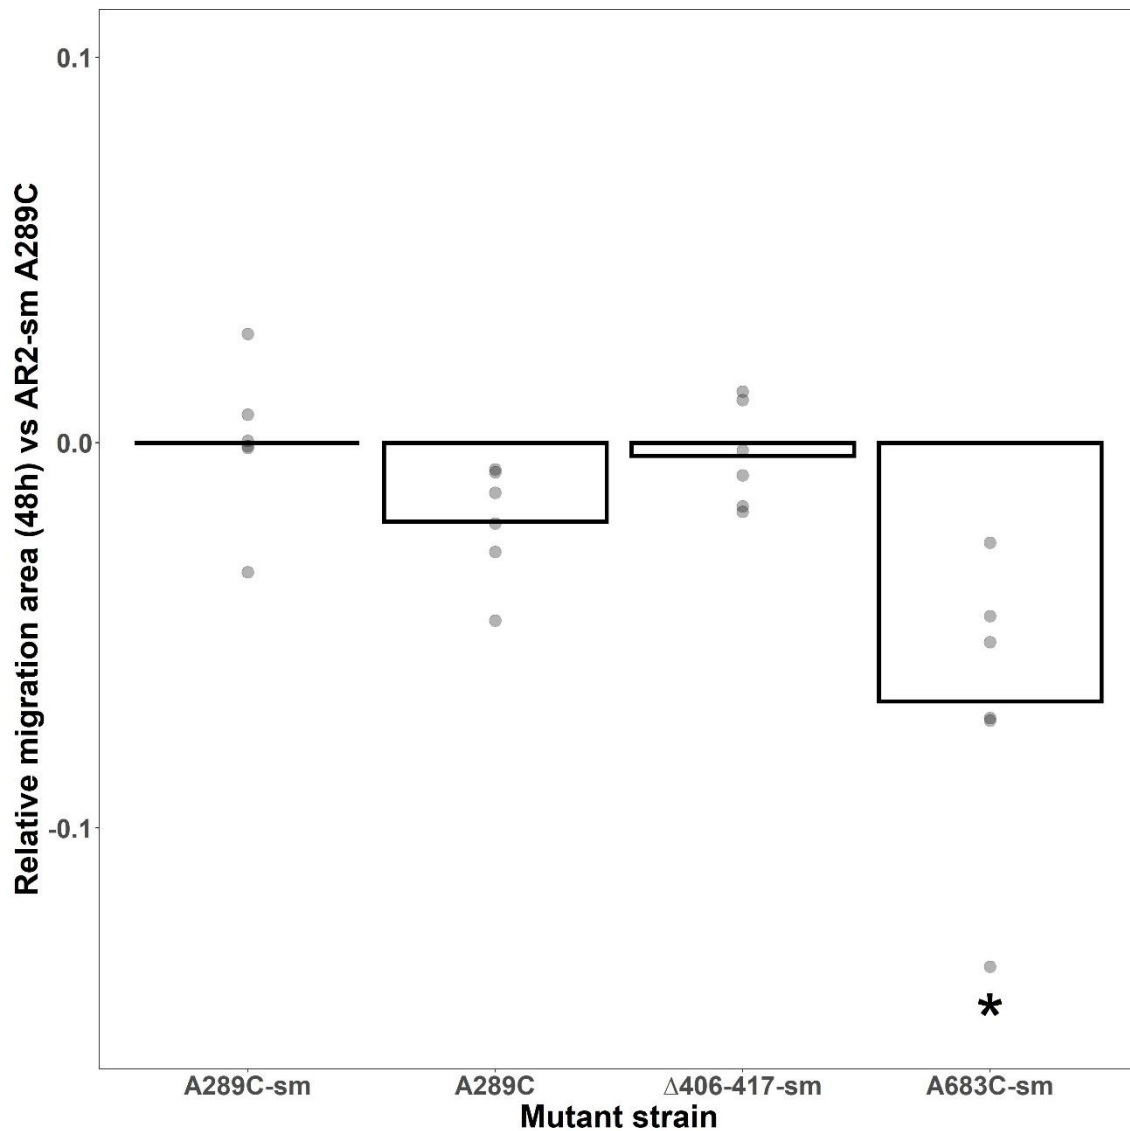

786

787 Fig. S3. *ntxB* A289C in AR2-sm retains comparative fitness to its ancestral counterpart. The motility  
788 phenotype of AR2 *ntxB* A289C and alternative AR2-sm *ntxB* mutants (Δ406-417-sm and A683-sm)  
789 were measured against an engineered AR2-sm *ntxB* A289C mutant (A289C-sm) in minimal medium.  
790 A289C-sm was not significantly outperformed by any strain, instead showing a significantly superior  
791 motility phenotype to A683-sm in M9. Although the two motile lines displayed comparable motility  
792 in an AR2 background (fig. 3A), the inferior phenotype observed here may be owed to an  
793 uncharacterised secondary mutation. Individual data points from biological replicates are plotted and  
794 each migration area has been standardised against the surface area of a *ntxB* A289C-sm mutant grown  
795 in the same environment (*ntxB* A289C-sm growth mean = 0). Significance values: \* =  $P < 0.05$ , \*\*  
796 (Kruskal-Wallis post-hoc Dunn test).

797

798 Table. S1. List of primers used throughout the study.

| For use in:                                                                                           | Primer description:                       | Sequence:                                               |
|-------------------------------------------------------------------------------------------------------|-------------------------------------------|---------------------------------------------------------|
| Sanger sequencing of ntr pathway / Invasion assay                                                     | SBW25 <i>ntrB</i> locus (forward)         | 5'- GAGGTCCAATGACCATCAG -3'                             |
|                                                                                                       | SBW25 <i>ntrB</i> locus (reverse)         | 5'- GACGATCCAGACGGTTTCAC -3'                            |
|                                                                                                       | SBW25 <i>glnK</i> locus (forward)         | 5'-GTGGGCAAAGGACTGATTC-3'                               |
|                                                                                                       | SBW25 <i>glnK</i> locus (reverse)         | 5'-GATGATGGCGAAGGTCATCT-3'                              |
|                                                                                                       | SBW25 <i>glnA</i> locus (forward)         | 5'-CGGAAATCGCTCAAGGTTTA-3'                              |
|                                                                                                       | SBW25 <i>glnA</i> locus (reverse)         | 5'-CTGATAATCCCCAGGCAAAA-3'                              |
| AR2 <i>ntrB</i> A683C integration into pTS1 backbone (allelic exchange)                               | Upstream fragment (forward)               | 5'- GAAATTAATAGGTTGTATTGATGTTGATGACCATCAGCGATGCACTG -3' |
|                                                                                                       | Upstream fragment (reverse)               | 5'- GAATGCTCGGGGCGTAGTCGC -3'                           |
|                                                                                                       | Downstream fragment (forward)             | 5'- GCGACTACGCCCGAGCATT -3'                             |
|                                                                                                       | Downstream fragment (reverse)             | 5'- GCCGTTTCTGTAATGAAGGAGAAAACATGTCGATGGGGCTCCTTG -3'   |
| AR2 <i>ntrB</i> synonymous substitution sequence integration into pTS1 backbone (allelic exchange)    | Upstream fragment (forward)               | 5'- GAAATTAATAGGTTGTATTGATGTTGTCCAAATGCCGCCTACATC -3'   |
|                                                                                                       | Upstream fragment (reverse)               | 5'- CGTTGCTGAGGATCGGCGTCACCGCGTAATCCACCGTCAG -3'        |
|                                                                                                       | Downstream fragment (forward)             | 5'- CTGACGGTGGATTACGCGGTGACGCCGATCCTCAGCAACG -3'        |
|                                                                                                       | Downstream fragment (reverse)             | 5'- GCCGTTTCTGTAATGAAGGAGAAAACGTTGATCAGCACGGTGATGT -3'  |
|                                                                                                       | SBW25 <i>ntrB</i> nested primer (forward) | 5'- AATTTGGATCCATGACCATCAGCGATGCACTG -3'                |
|                                                                                                       | SBW25 <i>ntrB</i> nested primer (reverse) | 5'- AATTTAAGCTTGATCCAGACGGTTTCACTACG -3'                |
| AR2 <i>ntrB</i> synonymous substitution sequence with A289C                                           | Upstream fragment (reverse)               | 5'- CGTTGCTGAGGATCGGCGGCACCGCGTAATCCACCGTCAG -3'        |
|                                                                                                       | Downstream fragment (forward)             | 5'- CTGACGGTGGATTACGCGGTGCCCGGATCCTCAGCAACG -3'         |
| Pf0-2x <i>ntrB</i> synonymous substitution sequence integration into pTS1 backbone (allelic exchange) | Upstream fragment (forward)               | 5'-TATCGCCTGCTGCTGGATGG-3'                              |
|                                                                                                       | Upstream fragment (reverse)               | 5'- CGTTGCTCAGGATAGGGGTCACGGCGTAGTCGACGGTCAG -3'        |
|                                                                                                       | Downstream fragment (forward)             | 5'- CTGACCGTCGACTACGCCGTGACCCCTATCCTGAGCAACG -3'        |
|                                                                                                       | Downstream fragment (reverse)             | 5'-TCCACACGGTTTCACTACGG-3'                              |
|                                                                                                       | Pf0-1 <i>ntrB</i> nested primer (forward) | 5'-AATTTGGATCCAGCGTCAGGTCAAACCGTGT-3'                   |
|                                                                                                       | Pf0-1 <i>ntrB</i> nested primer (reverse) | 5'-AATTTAAGCTTTGGTGTGGCTGATGATGTT-3'                    |
| Screening engineered lines for counter-selection escape                                               | <i>sacB</i> check (Forward)               | 5'-TCAATCATACCGAGAGCGCC-3'                              |
|                                                                                                       | <i>sacB</i> check (Reverse)               | 5'-TGTCGCAAACTATCACGGCT-3'                              |

799
